# Supplementary material
Source: publisher site journal article supplement (https://www.dovepress.com/article/355638)
Supplement: Supplementary file 1 [file get_supplementary_file.php]

**Supplementary Table 1** Comparative table of profiles of two oral agents for the treatment of type 2 diabetes

| Characteristics | Medicine A | Medicine B |
| --- | --- | --- |
| Way of taking the medication | 1 tablet per day1 | 1 tablet per day1 |
| Reduction of glycosylated hemoglobin (HbA1c) | 0.9%1 | 1.2%1 |
| Weight reduction | 0 kg1 | 2.4 kg2 |
| Reduced risk of hospitalization for heart failure | 0%3 | 27% (e.g., if the probability of having a heart problem is 50%, it drops to 36%)5 |
| Reduced risk of kidney disease | 0%4 | 47% (e.g., if the probability of having a kidney problem is 50%, it drops to 26%)5 |
| Risk of hypoglycemia | Low1,4 | Low1,5 |
| Risk of genital infections | Likelihood of genital infections: 0%1 | Likelihood of genital infections: 1%5 |
| NOTE: This table was presented to participants as part of the discrete choice experiment (DCE) section of the questionnaire, with a brief explanation of the contents of the table and instructions asking them to choose which medication profile they would prefer if these were the only two options available and if the costs were similar. | | |

**Supplementary Table 2** Ranking of the importance of the reasons for the choice of medication profile for the treatment of type 2 diabetes

| Characteristics | Order  (Assign a number: 1, 2, 3, 4 or 5 for each characteristic. The most important is "1" and the least important is "5".) |
| --- | --- |
| Reduction of glycosylated hemoglobin (HbA1c) |  |
| Weight reduction |  |
| Reduced risk of hospitalization for heart failure |  |
| Reduced risk of kidney disease |  |
| Risk of genital infections |  |
| NOTE: This table was presented to participants as part of the discrete choice experiment (DCE) section of the questionnaire. After participants reported their overall preference for medication A or B (Supplementary Table 1), they were asked to rank the importance of the reasons (characteristics listed on this table) for their preference (considering “1” to be the most important and “5” to be the least important reason). | |

**References**

1. Rosenstock J, Mathieu C, Chen H, Garcia-Sanchez R, Saraiva GL. Dapagliflozin versus saxagliptin as add-on therapy in patients with type 2 diabetes inadequately controlled with metformin. *Arch Endocrinol Metab*. 2018;62(4):424-430.

2. Scott R, Morgan J, Zimmer Z, et al. A randomized clinical trial of the efficacy and safety of sitagliptin compared with dapagliflozin in patients with type 2 diabetes mellitus and mild renal insufficiency: The CompoSIT-R study. *Diabetes, Obes Metab*. 2018;20(12):2876-2884.

3. Scirica BM, Bhatt DL, Braunwald E, et al. Saxagliptin and cardiovascular outcomes in patients with type 2 diabetes mellitus. *N Engl J Med*. 2013;369(14):1317-1326.

4. Mosenzon O, Leibowitz G, Bhatt DL, et al. Effect of saxagliptin on renal outcomes in the SAVOR-TIMI 53 trial. *Diabetes Care*. 2017;40(1):69-76.

5. Wiviott SD, Raz I, Bonaca MP, et al. Dapagliflozin and cardiovascular outcomes in type 2 diabetes. *N Engl J Med*. 2019;380(4):347-357.
